# Supplementary material for: Mendelian randomization supports genetic liability to hospitalization for COVID-19 as a risk factor of pre-eclampsia
Source: PubMed Central journal article supplement (PMC10957568; doi:10.3389/fcvm.2024.1327497), 2024-03-08
Supplement: Image1.pdf [file Image1.pdf]

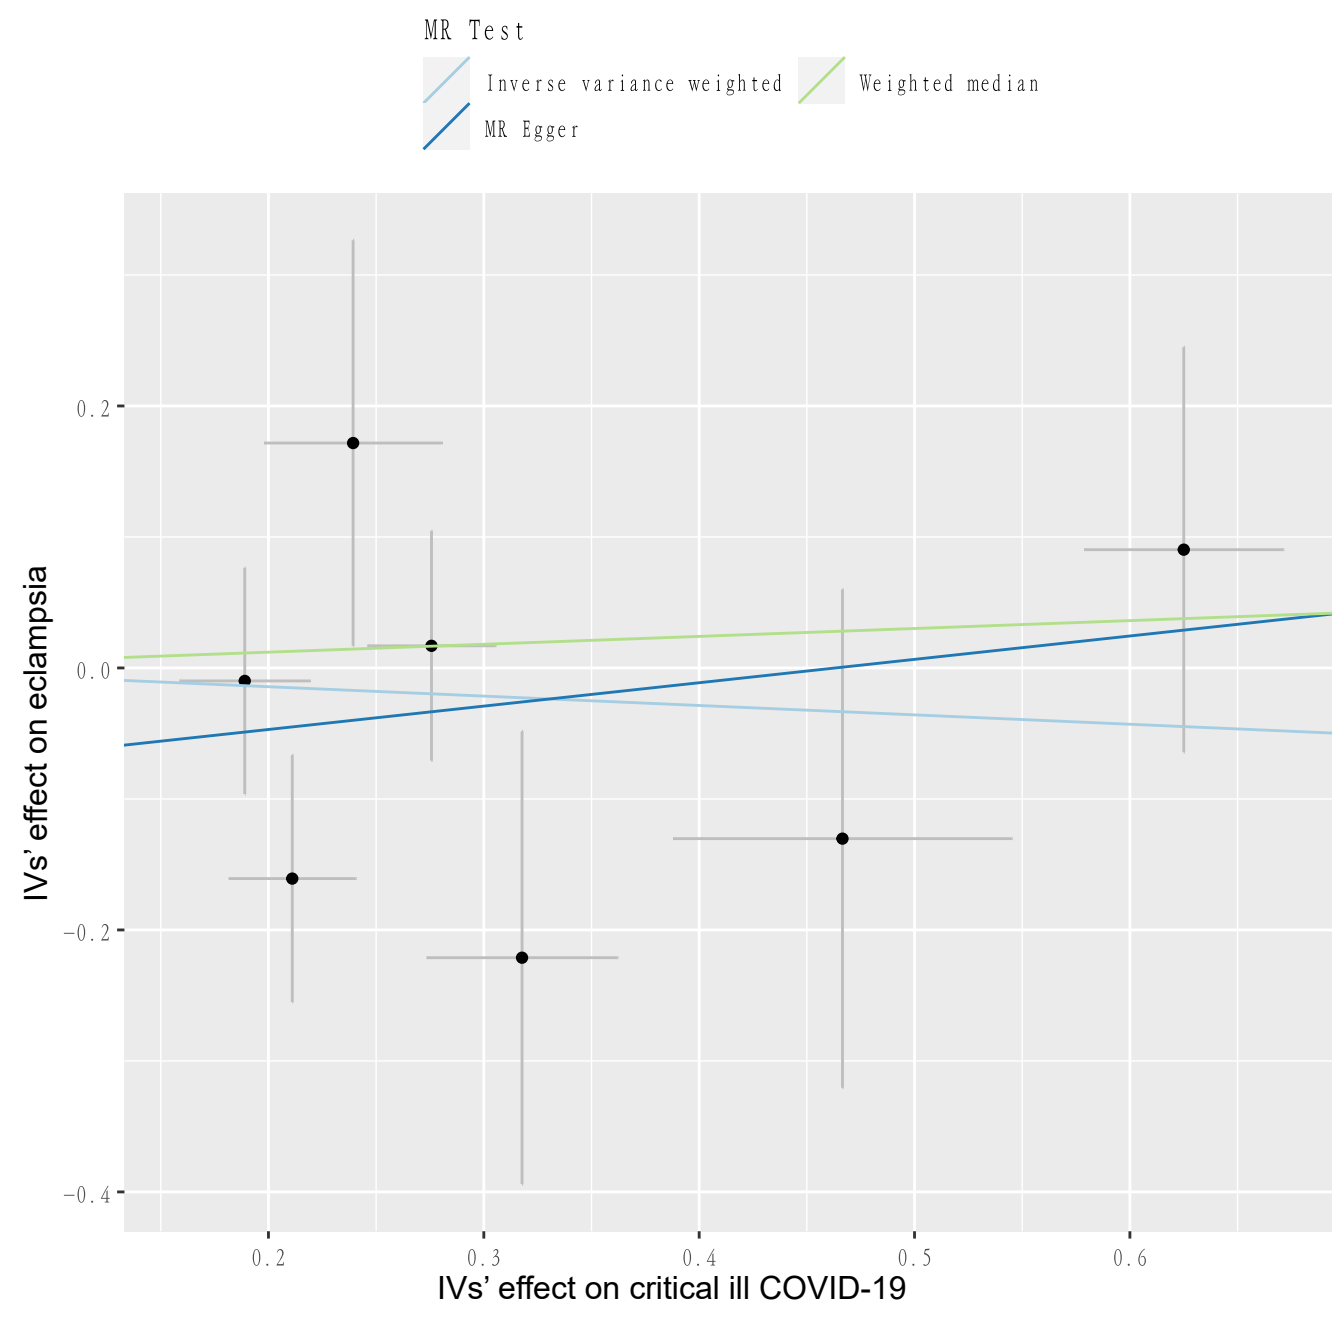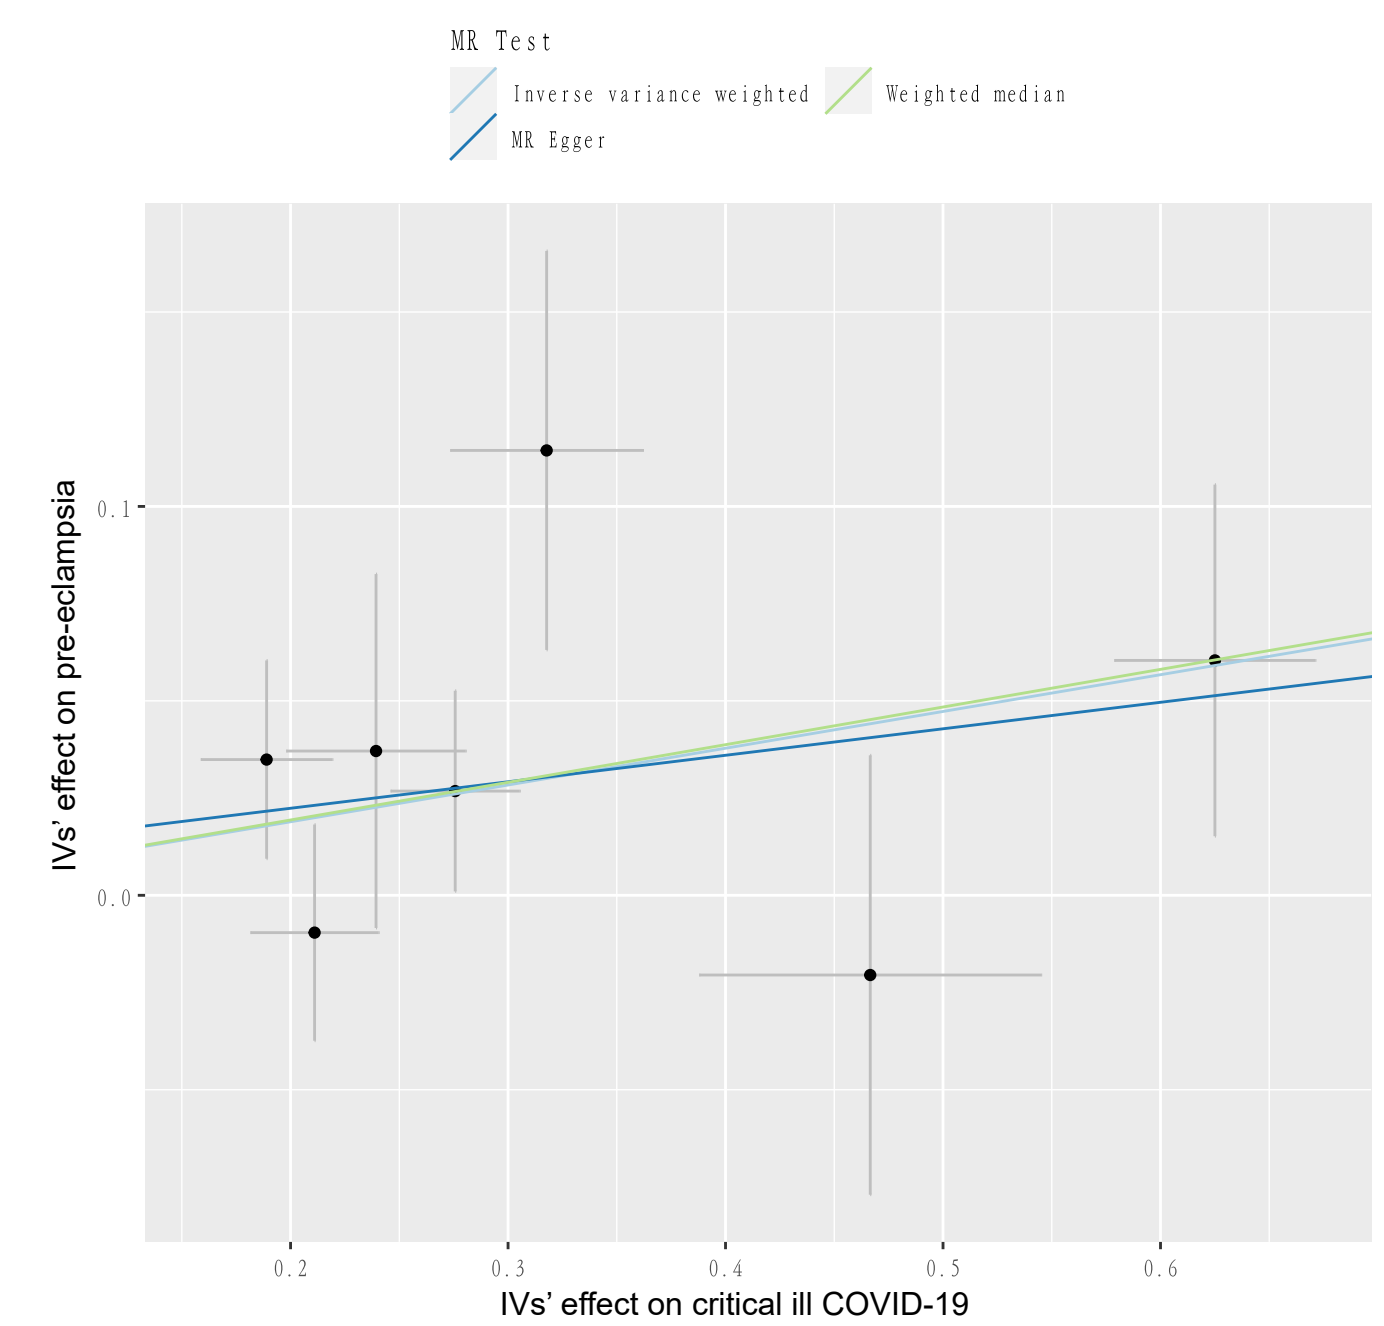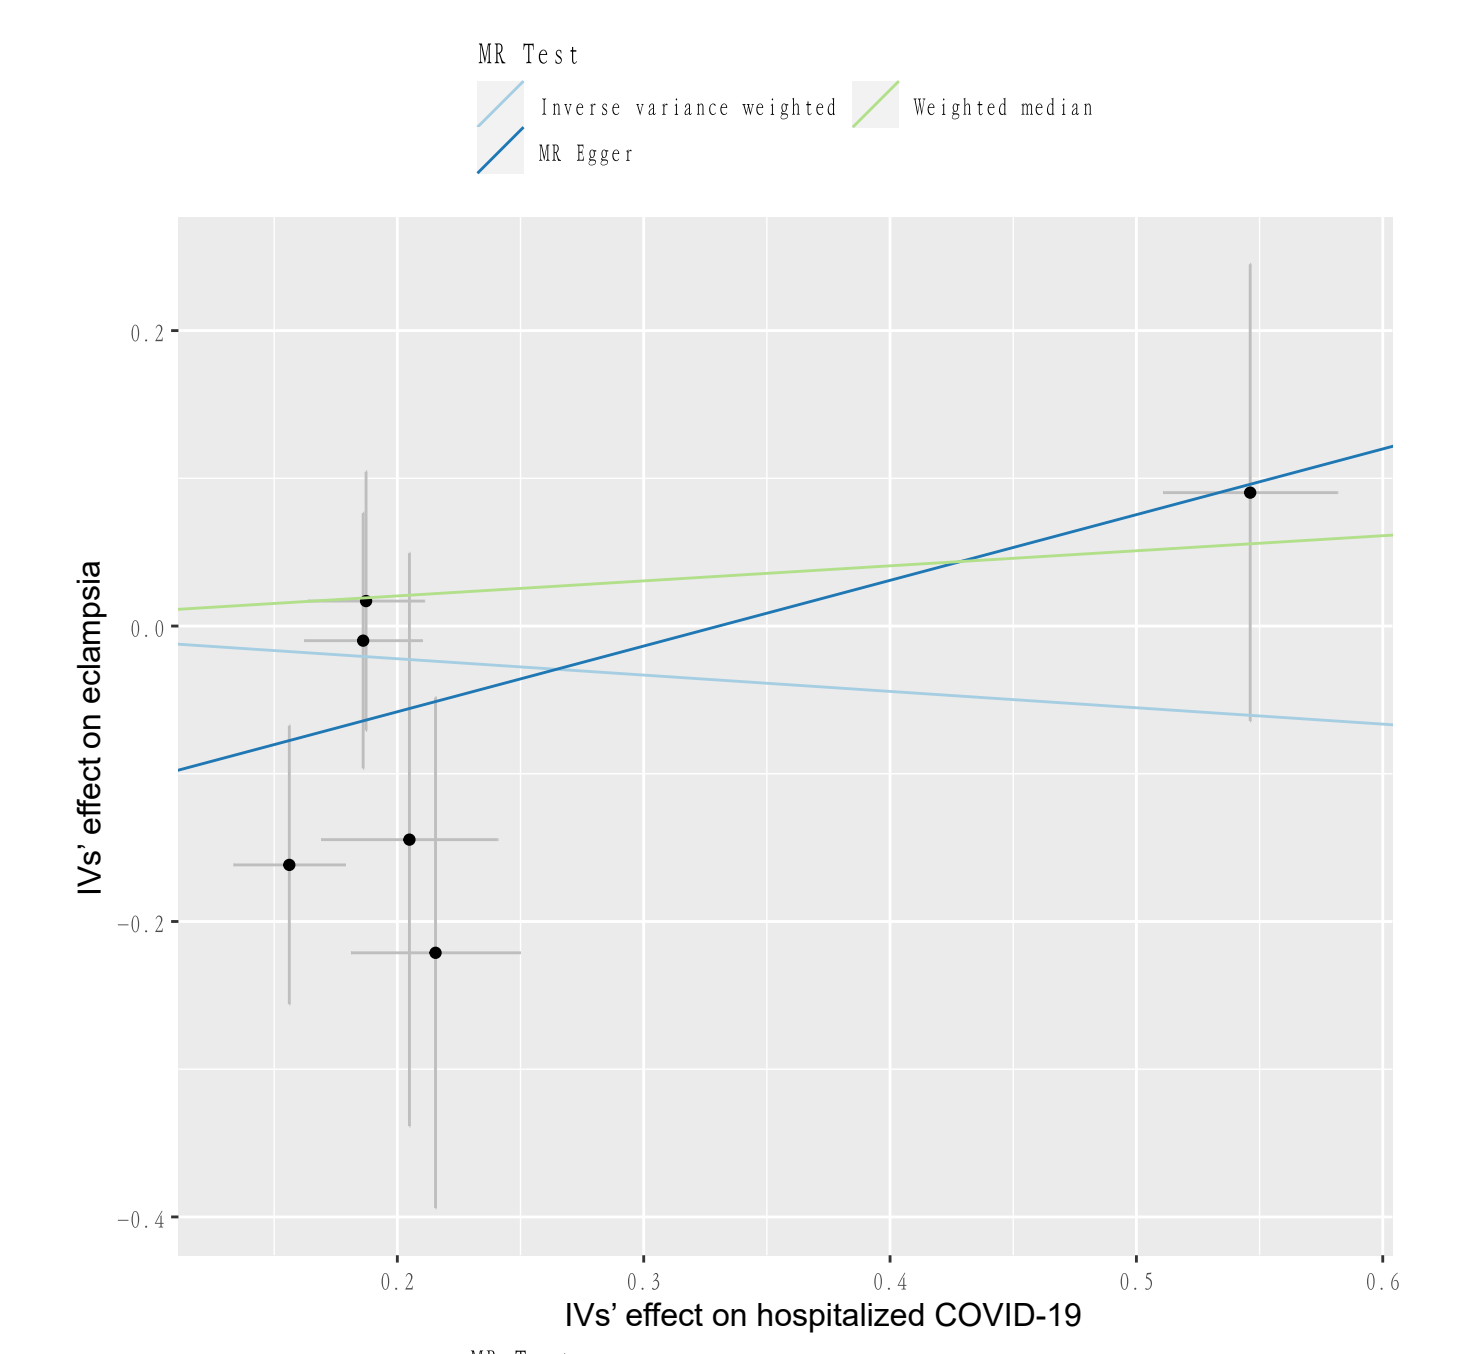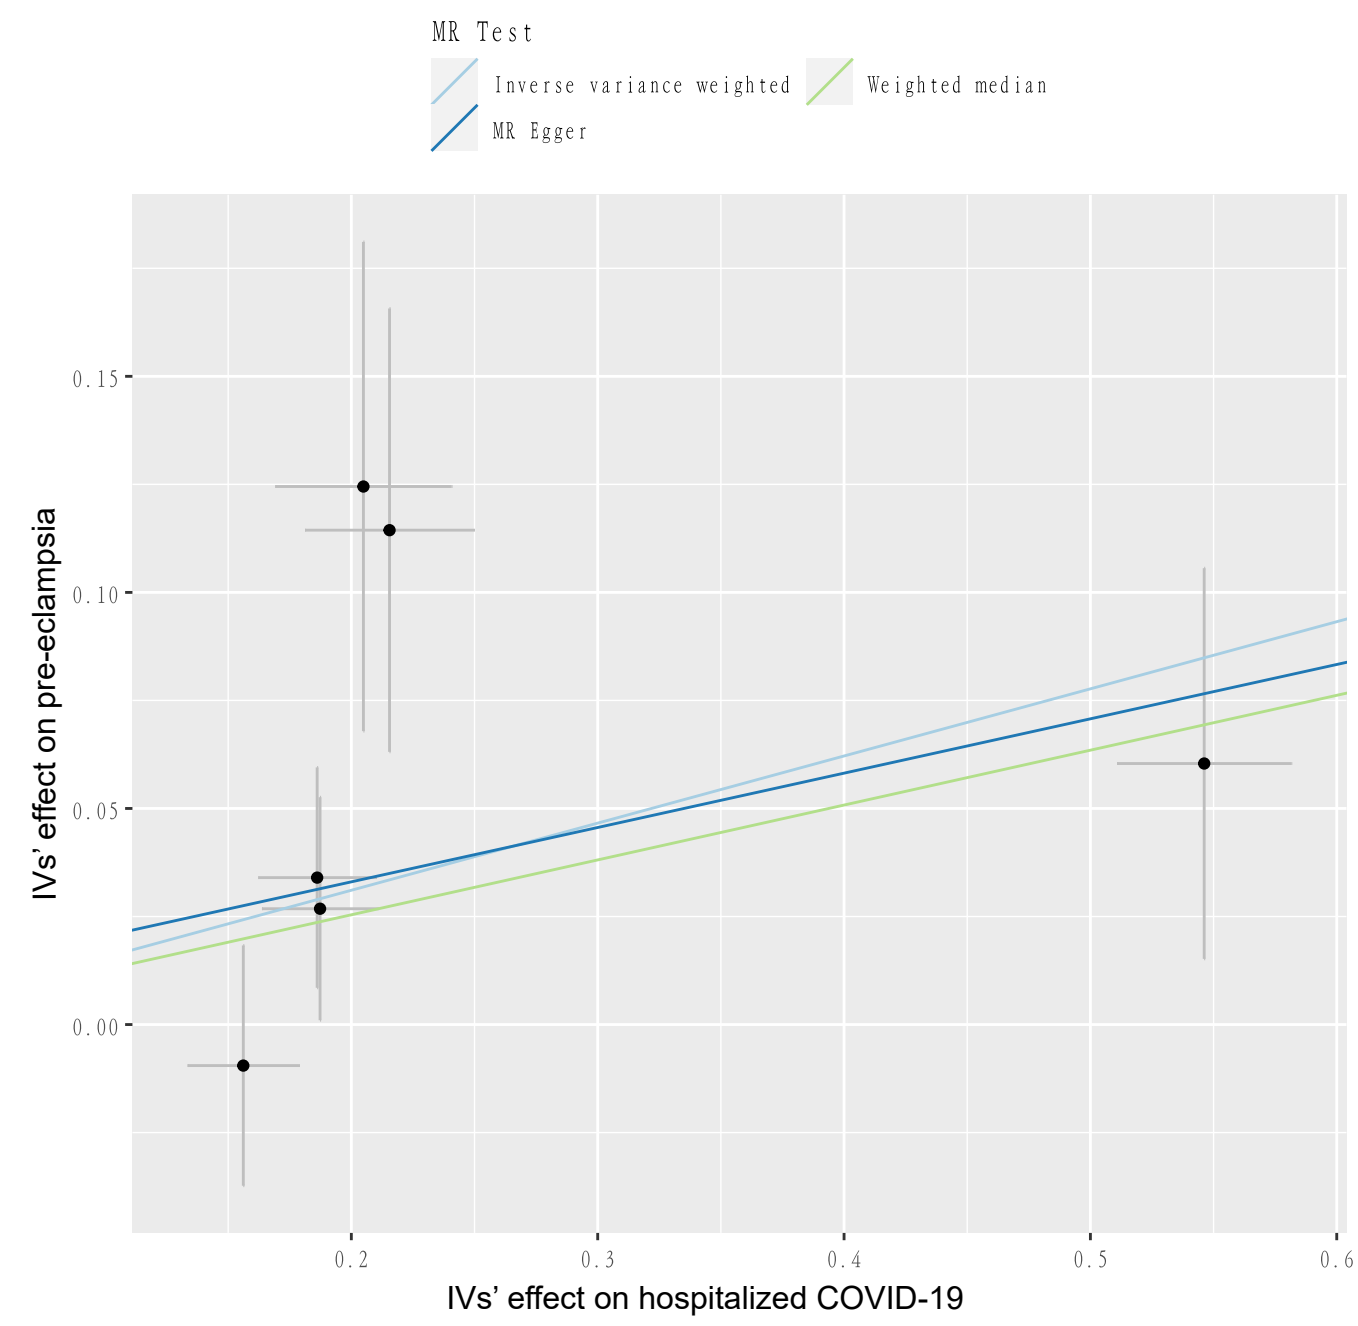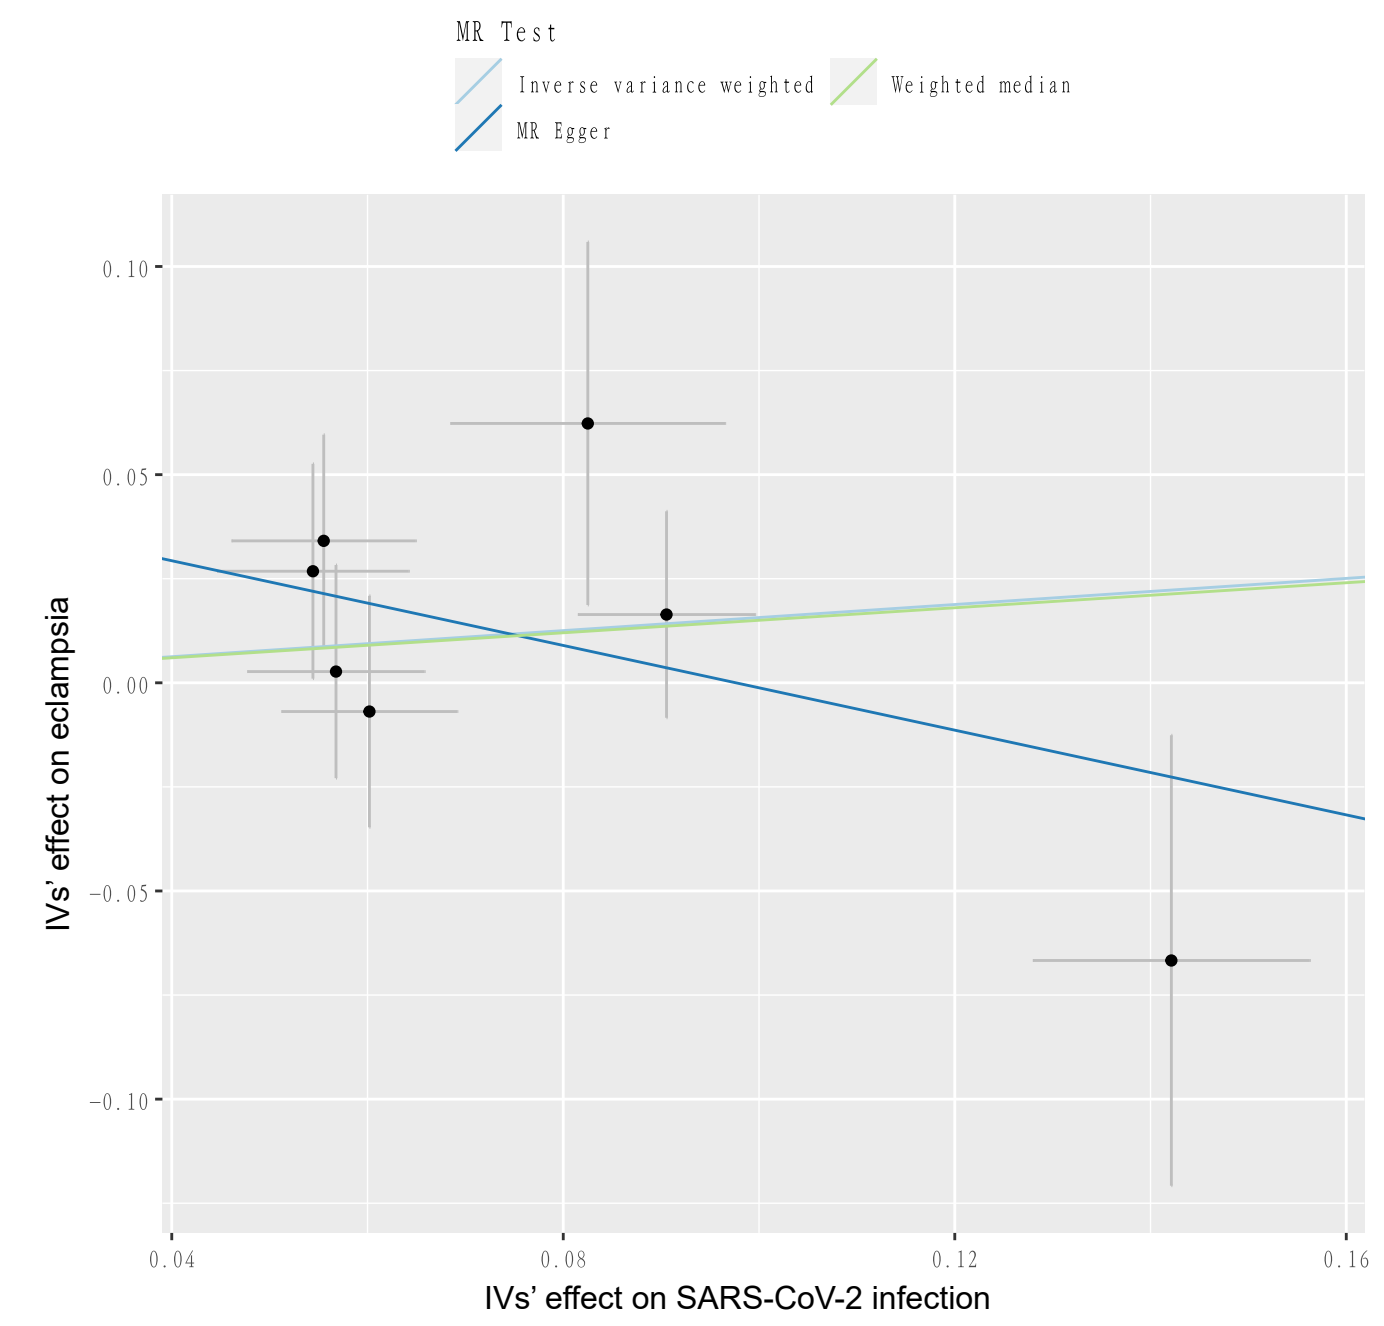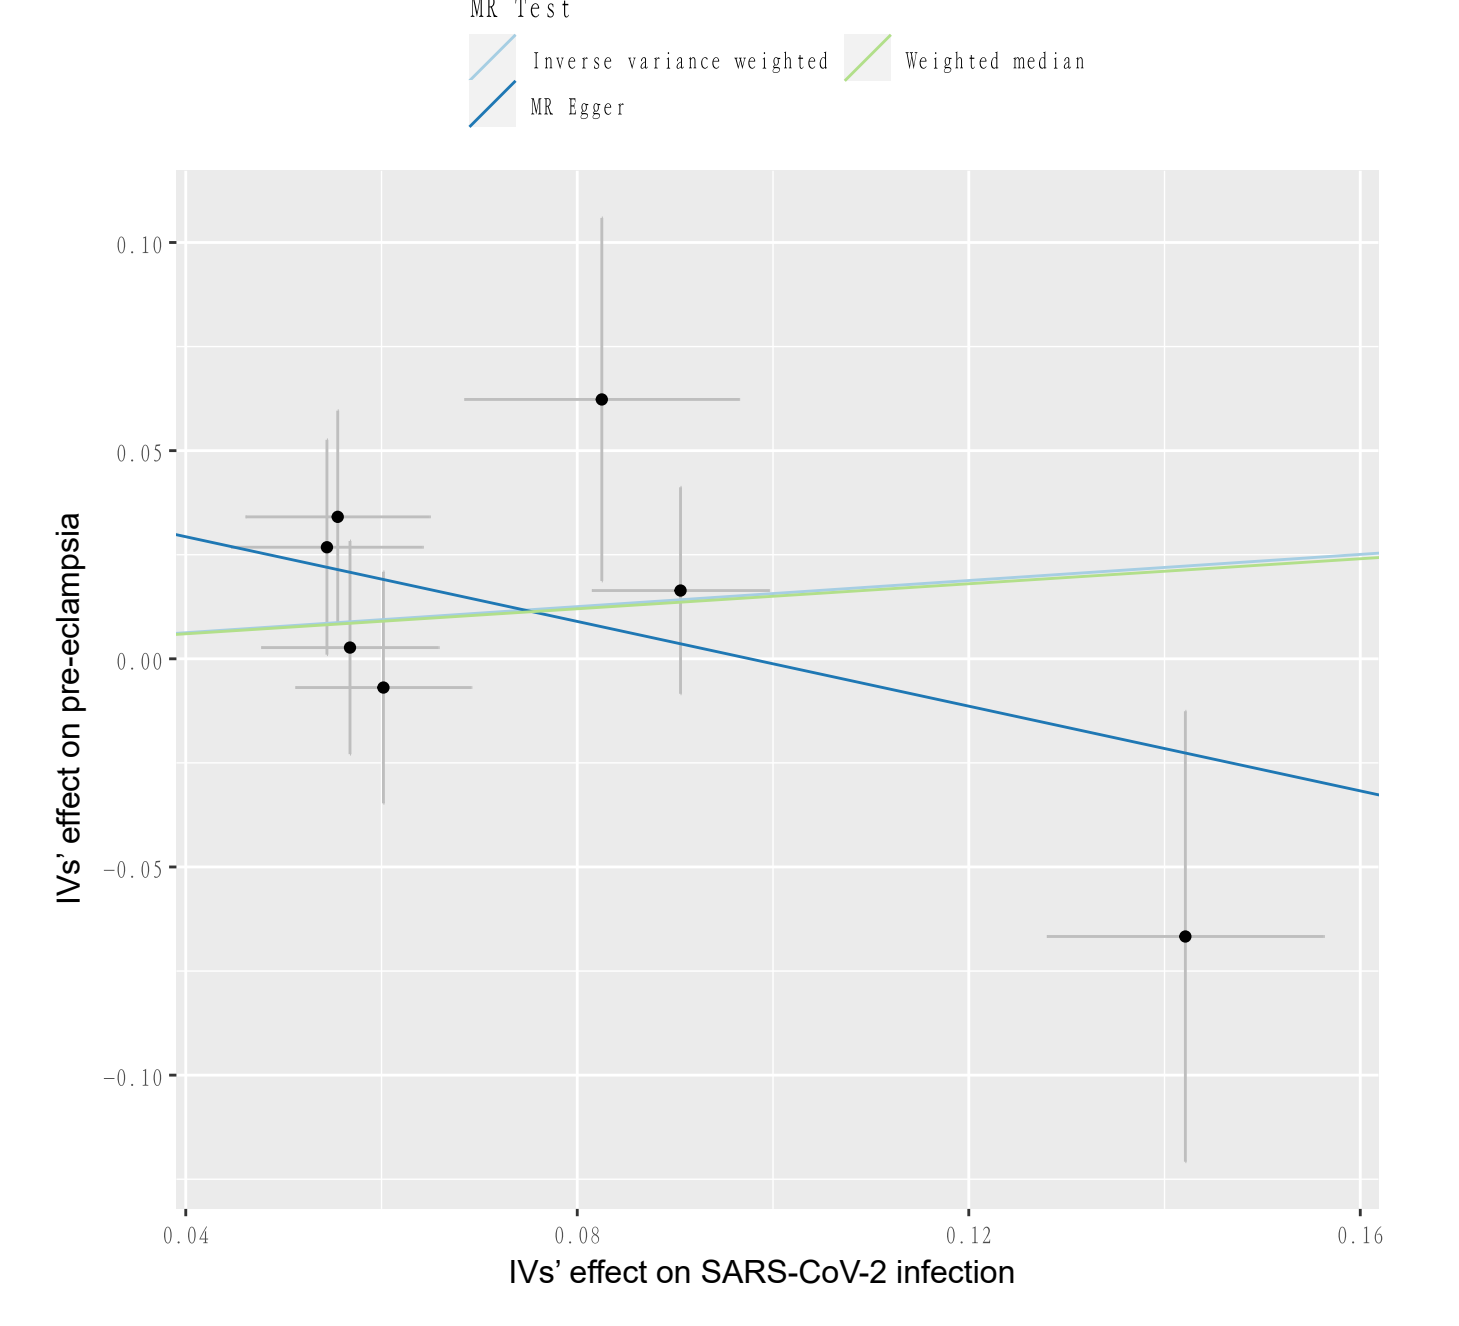

Supplement Figure 1 Scatter plots of the effect of instrumental variables of three COVID-19 severity phenotypes on pre-eclampsia and eclampsia. Abbreviations: IVs - instrumental variables.
