# Supplementary material for: Mendelian randomization supports genetic liability to hospitalization for COVID-19 as a risk factor of pre-eclampsia
Source: PubMed Central journal article supplement (PMC10957568; doi:10.3389/fcvm.2024.1327497), 2024-03-08
Supplement: Image2.pdf [file Image2.pdf]

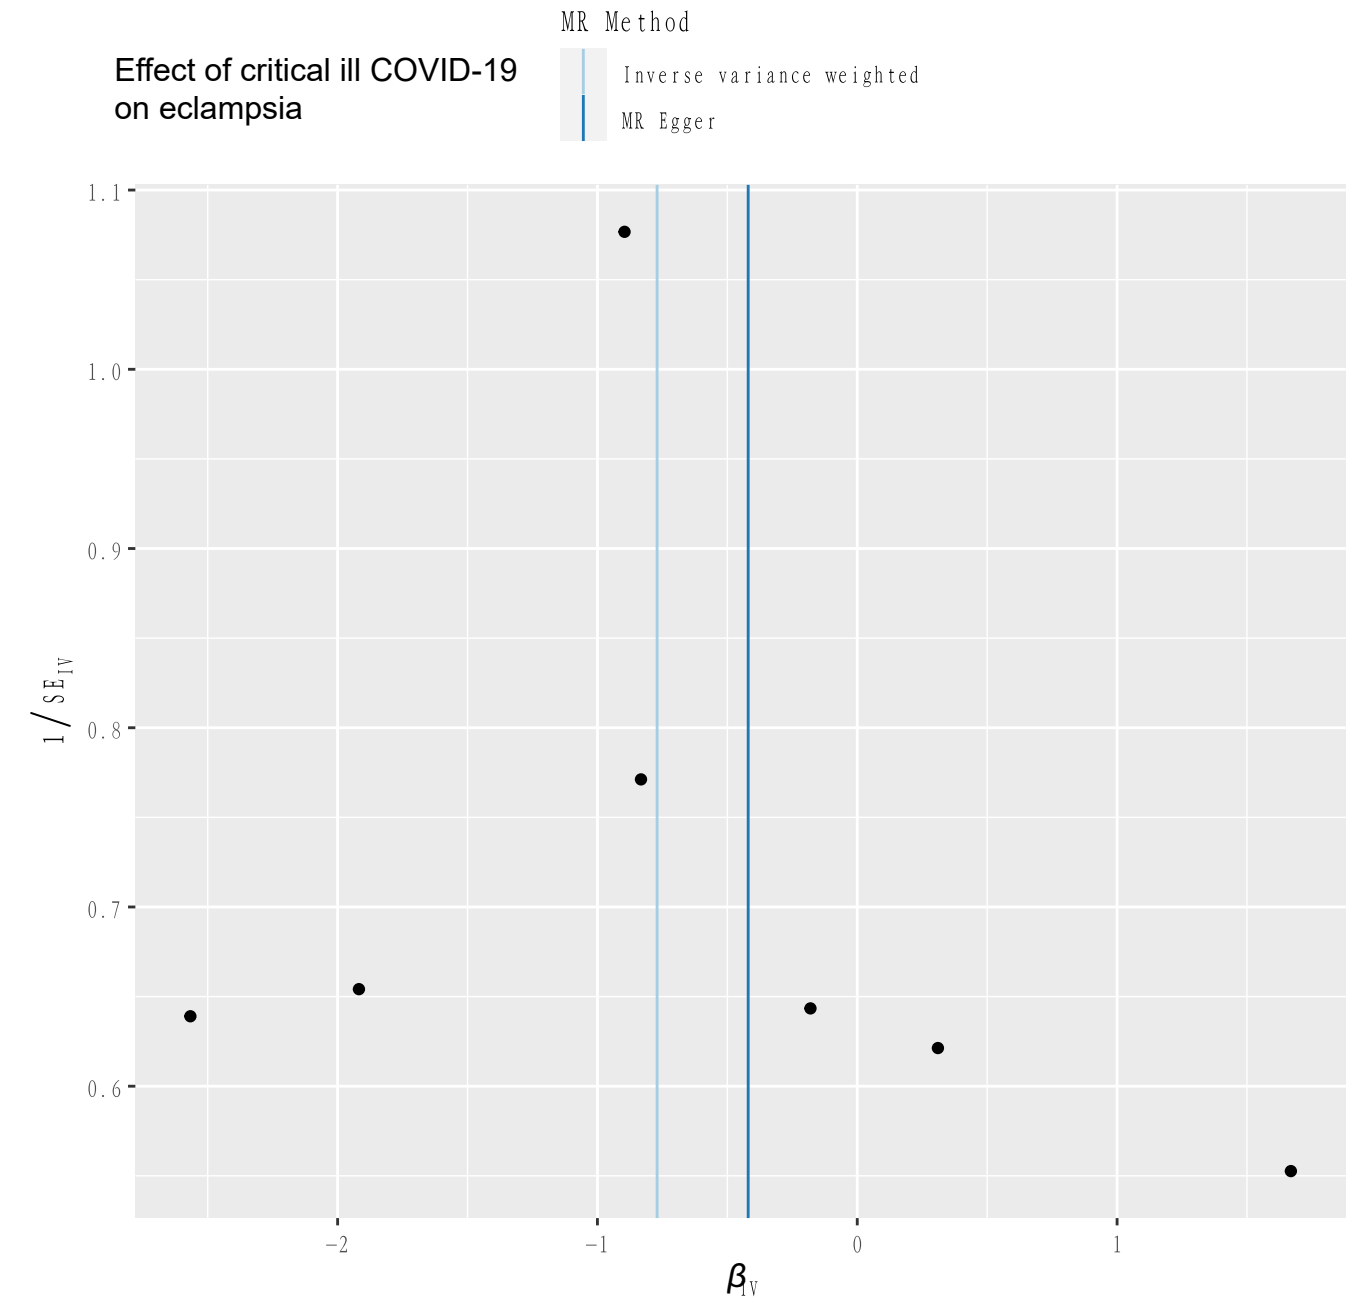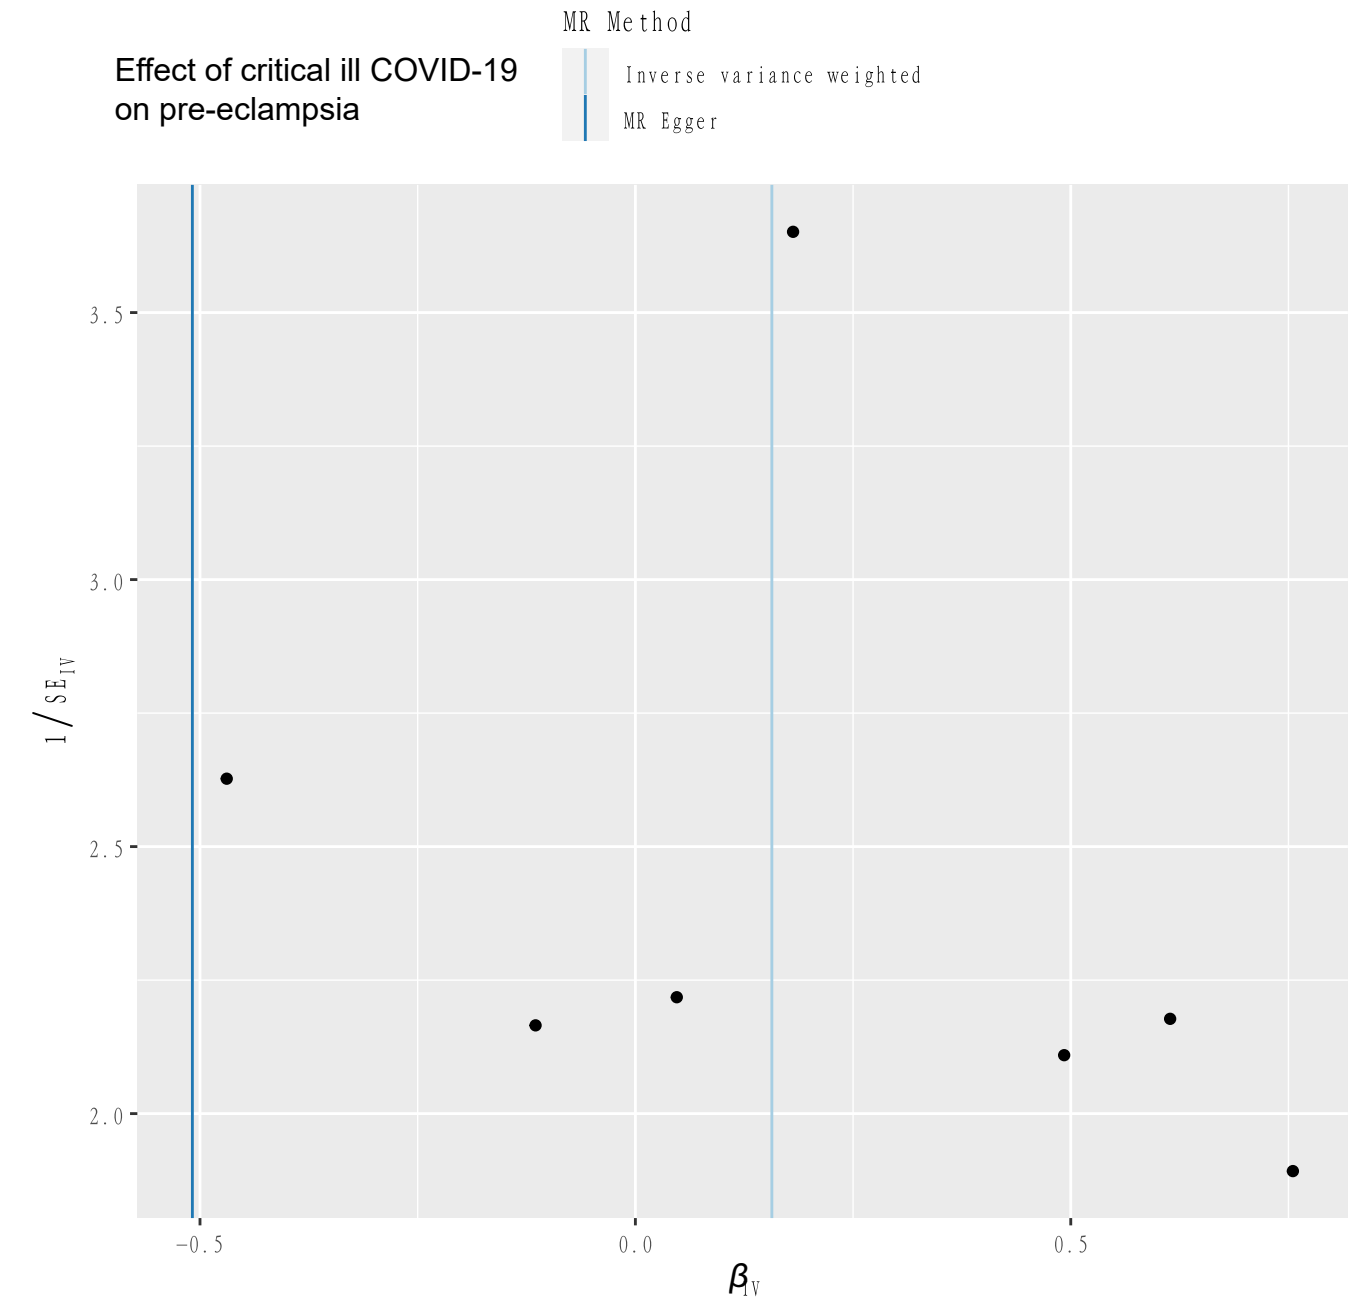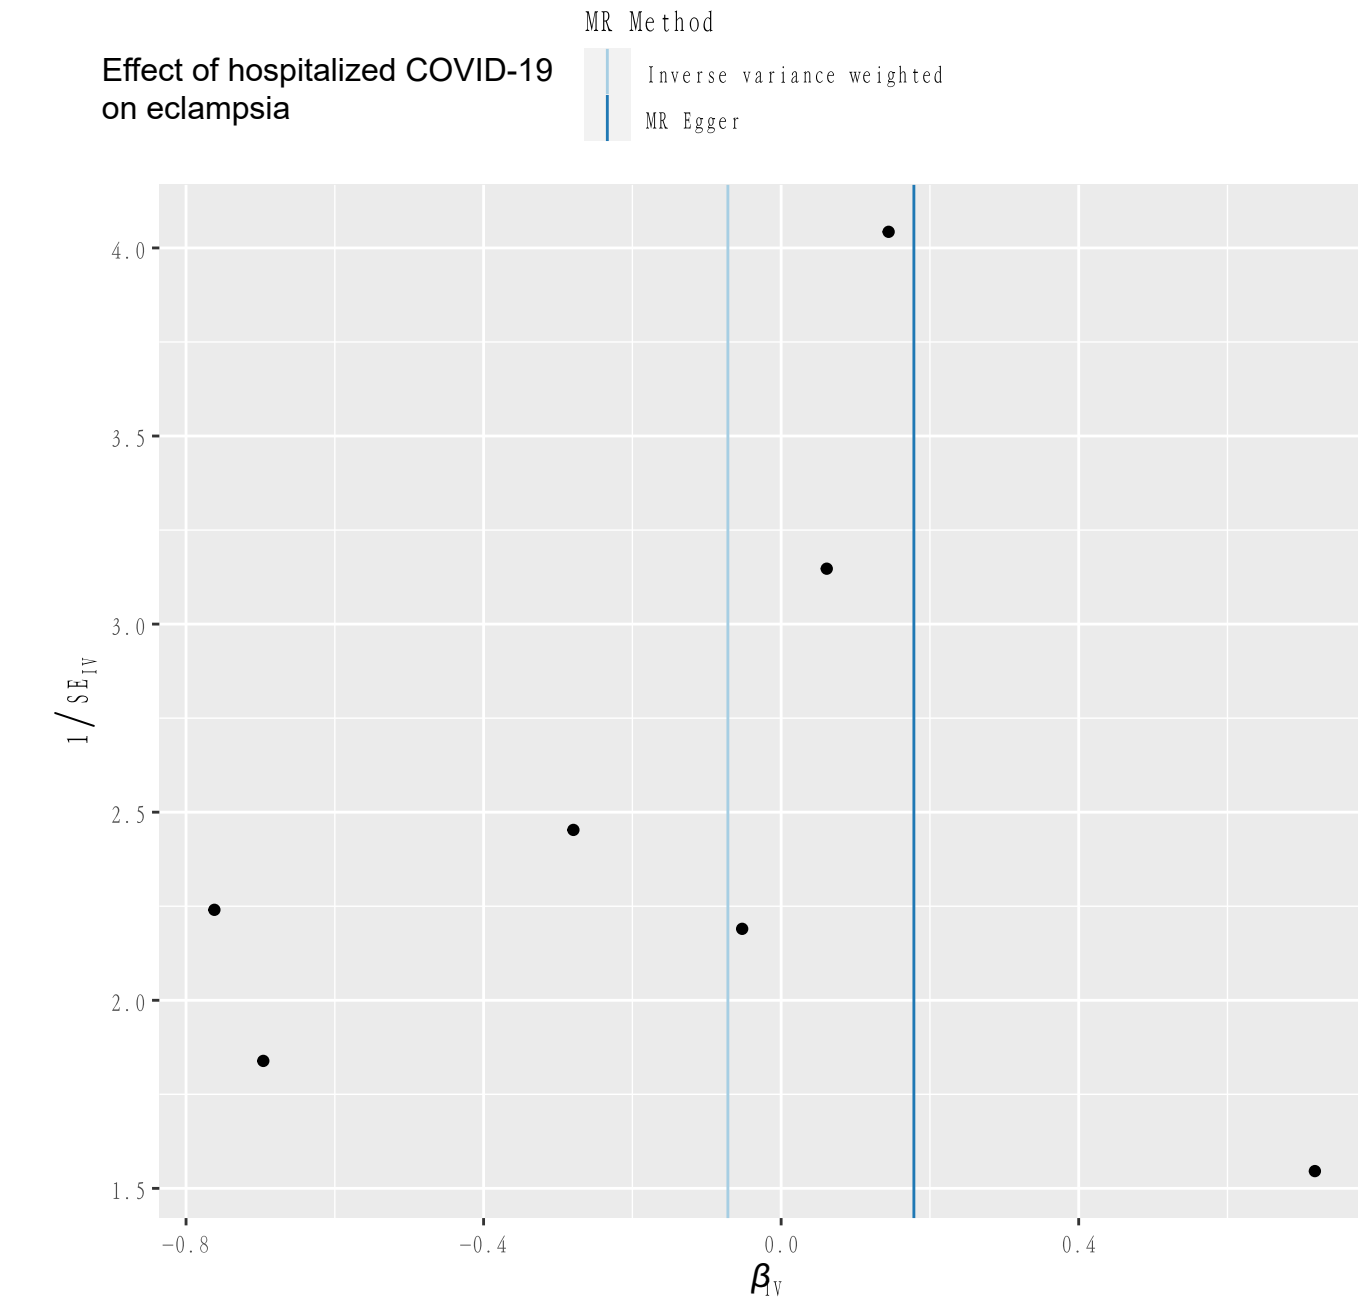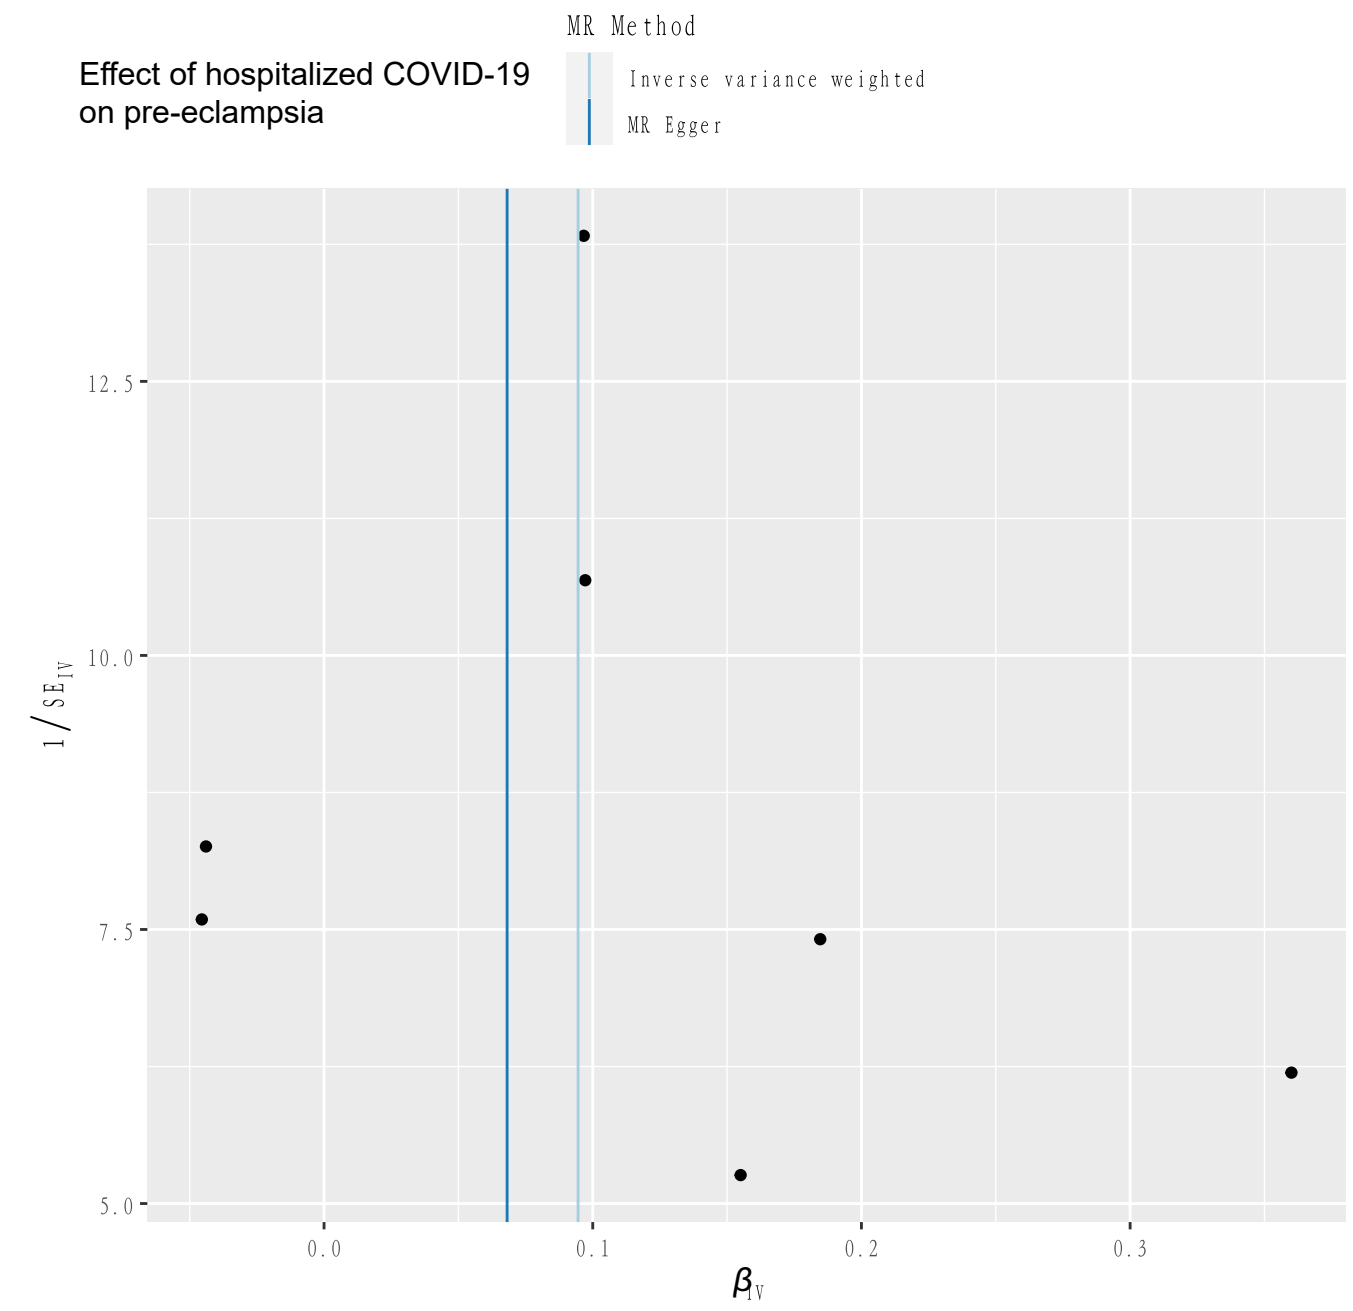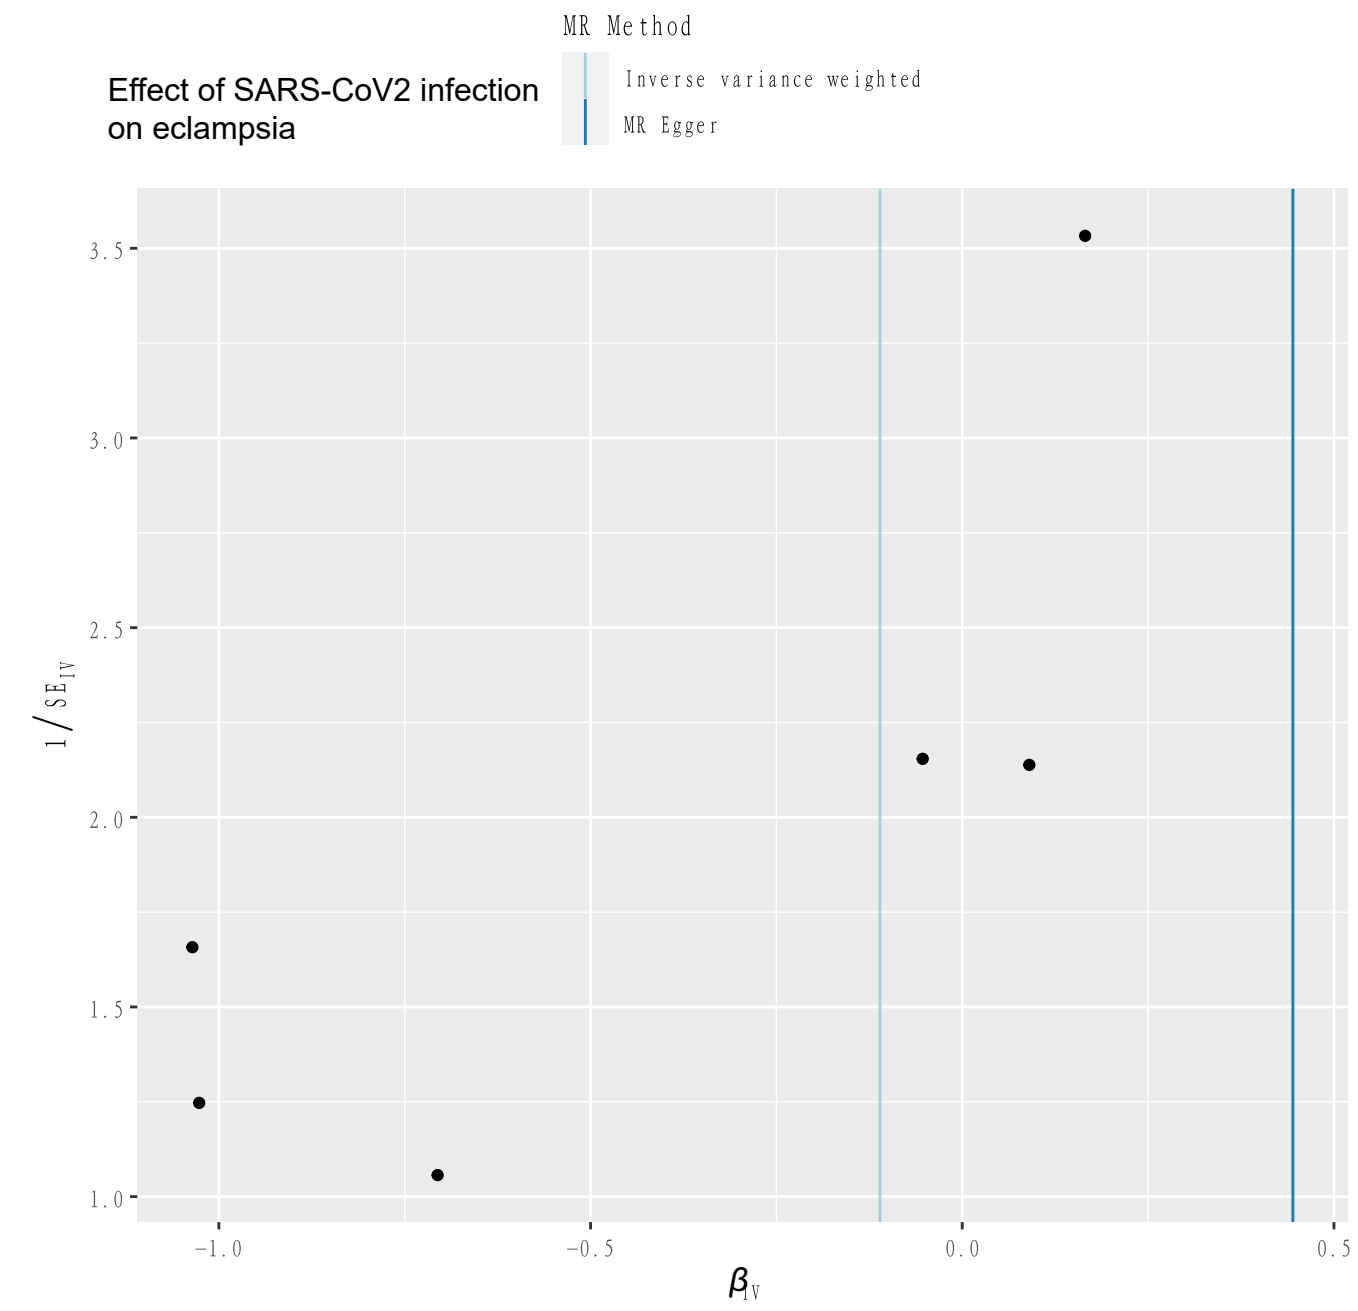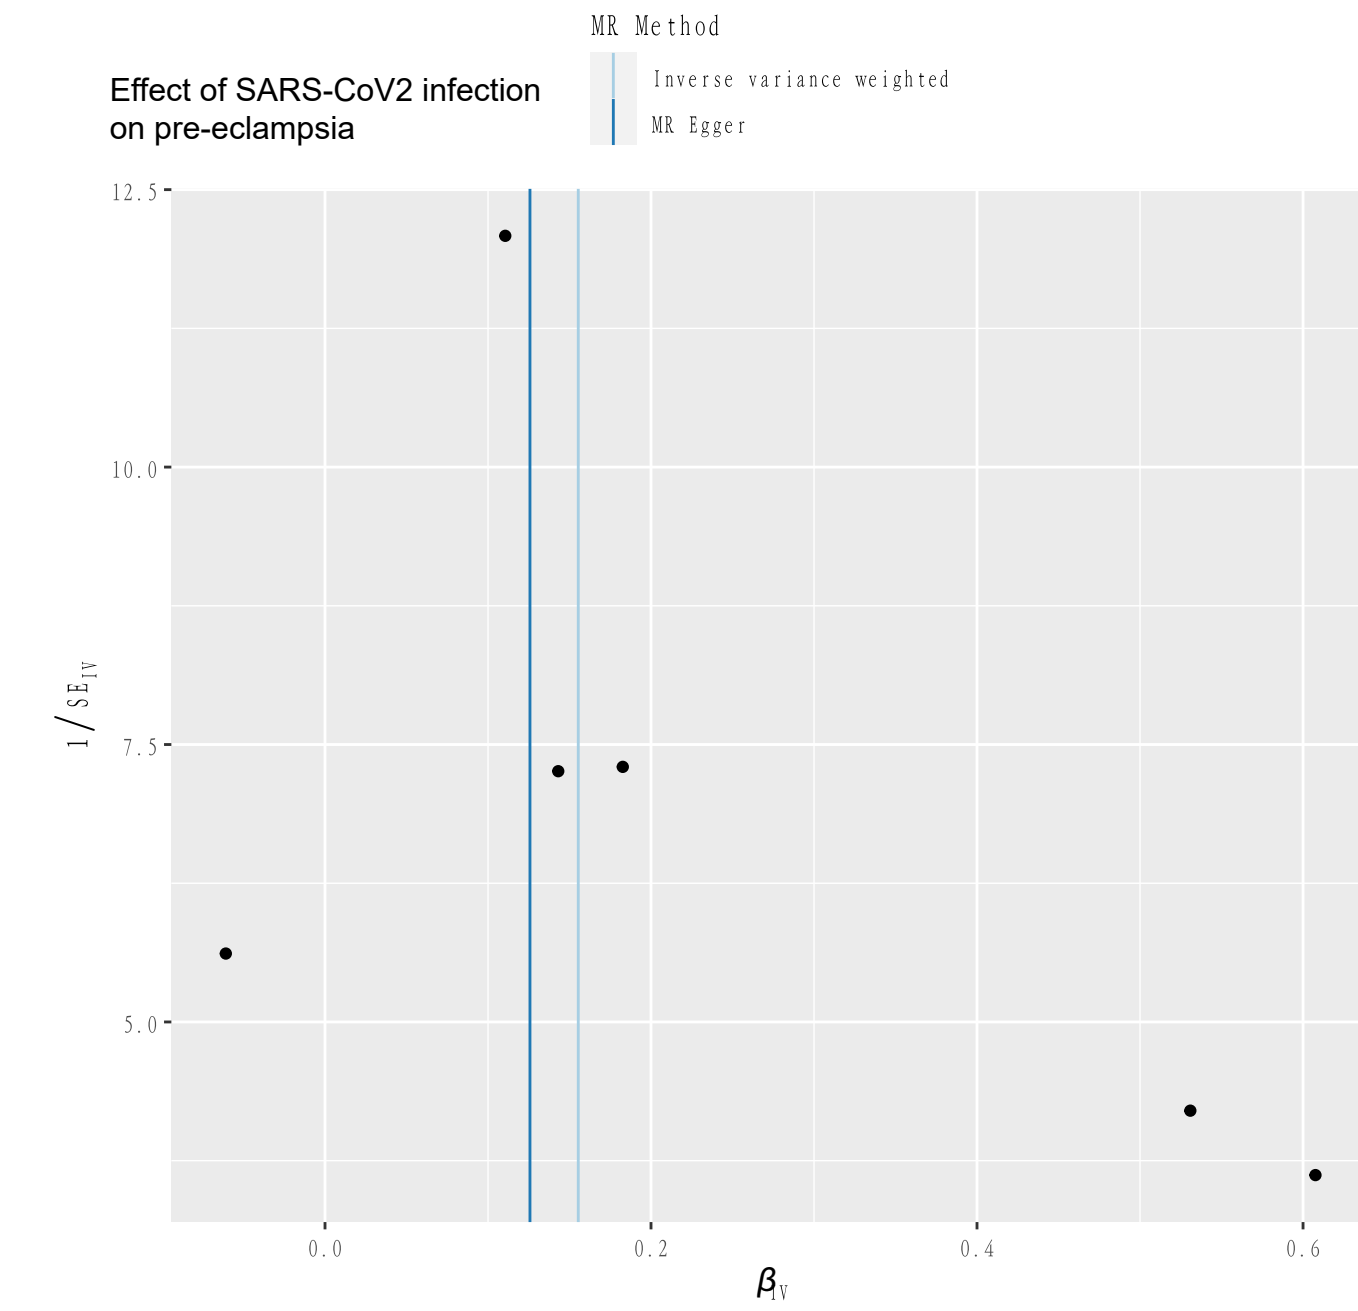

Supplement Figure 2 Funnel plots of effects of three types of COVID-19 traits on pre-eclampsia and eclampsia. Abbreviations: MR - mendelian randomization; SE - standard error.
