# Supplementary material for: Mendelian randomization supports genetic liability to hospitalization for COVID-19 as a risk factor of pre-eclampsia
Source: PubMed Central journal article supplement (PMC10957568; doi:10.3389/fcvm.2024.1327497), 2024-03-08
Supplement: Image3.pdf [file Image3.pdf]

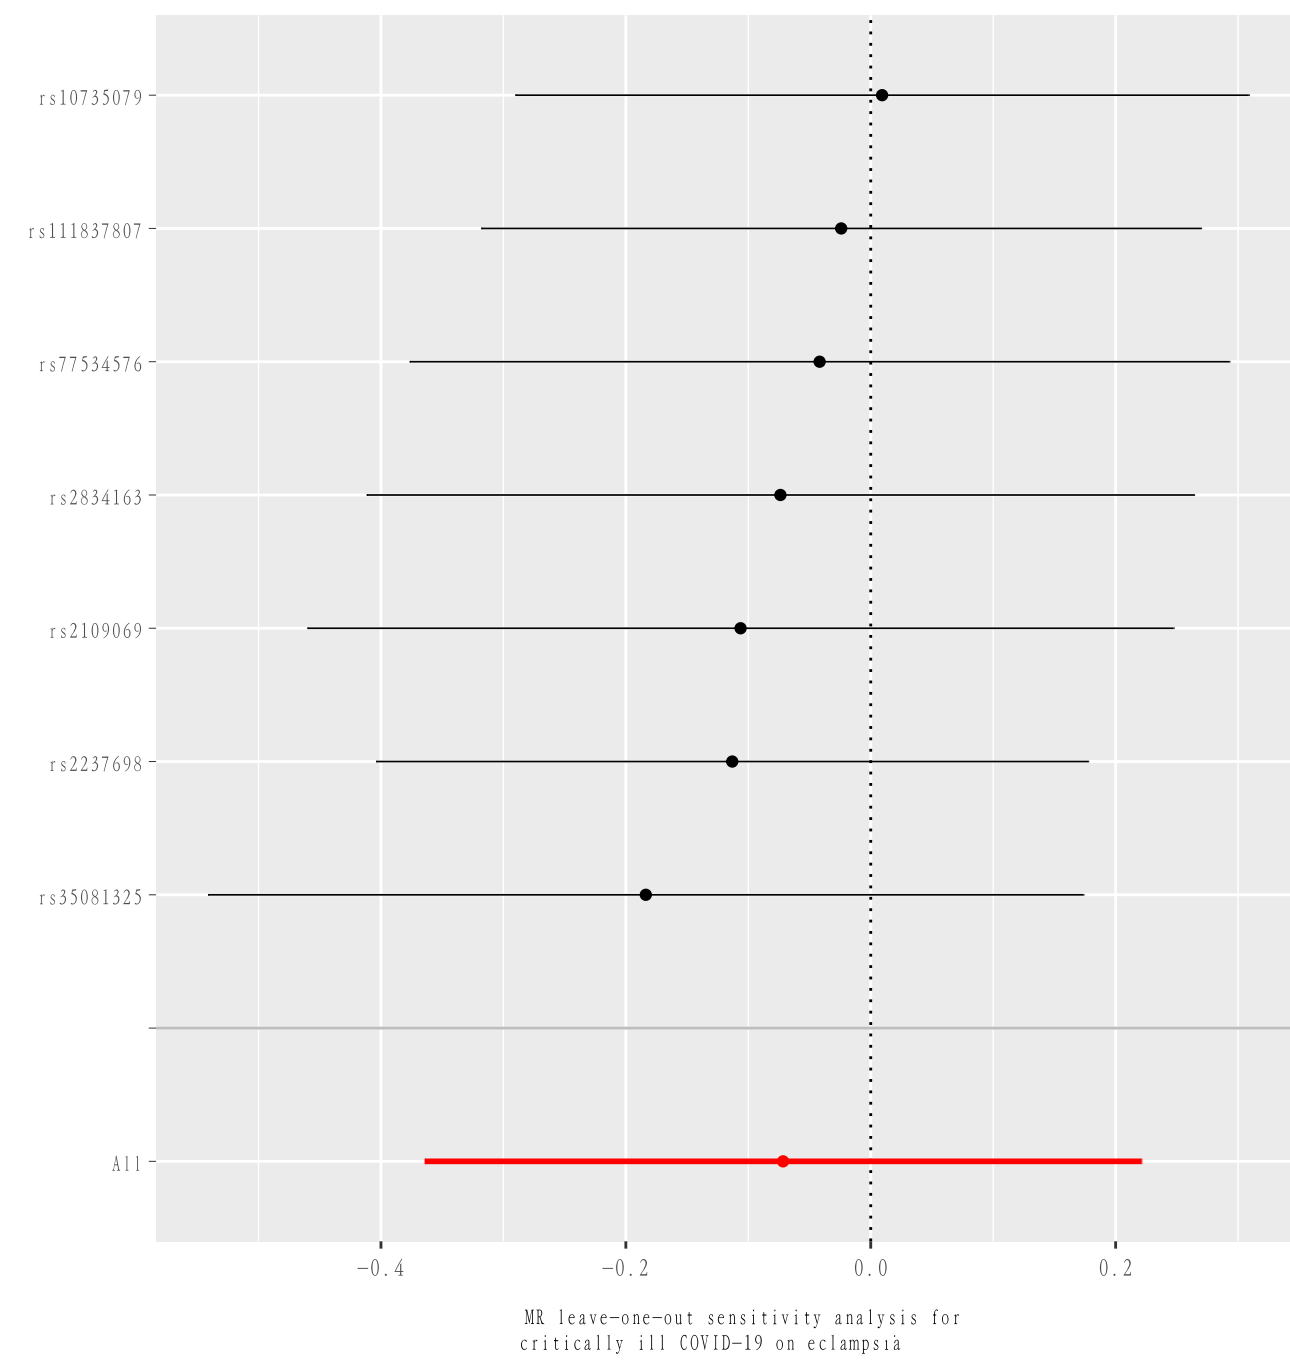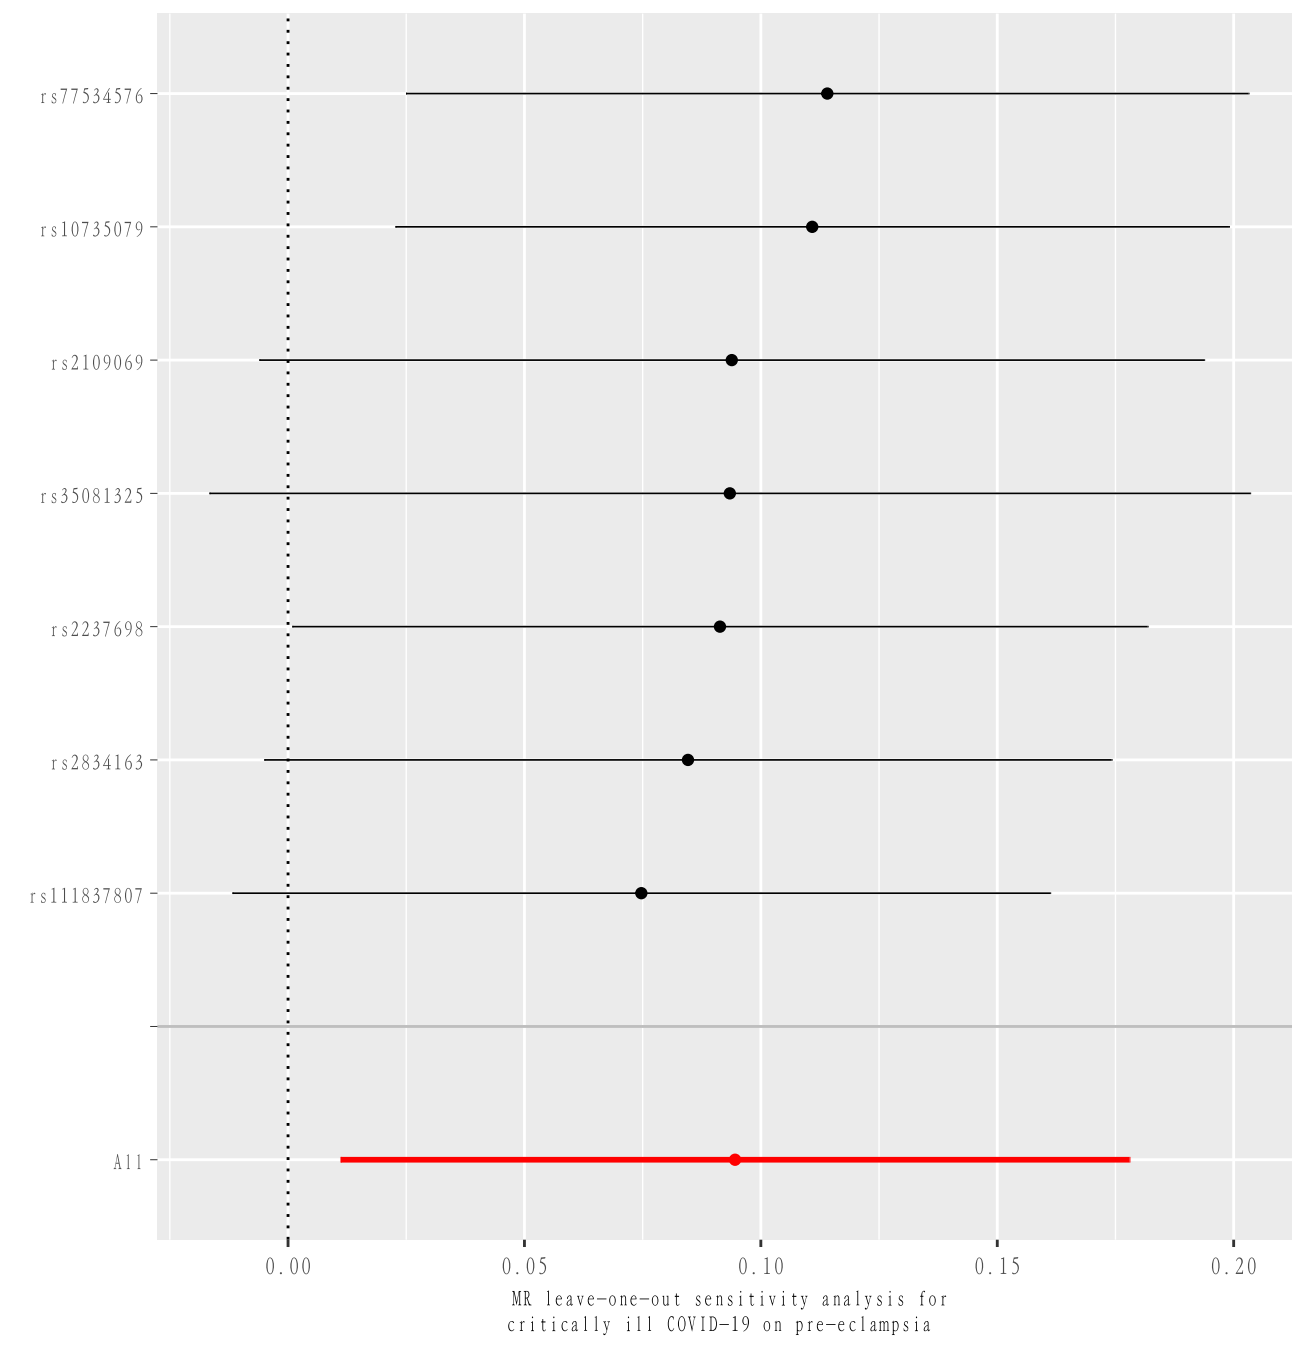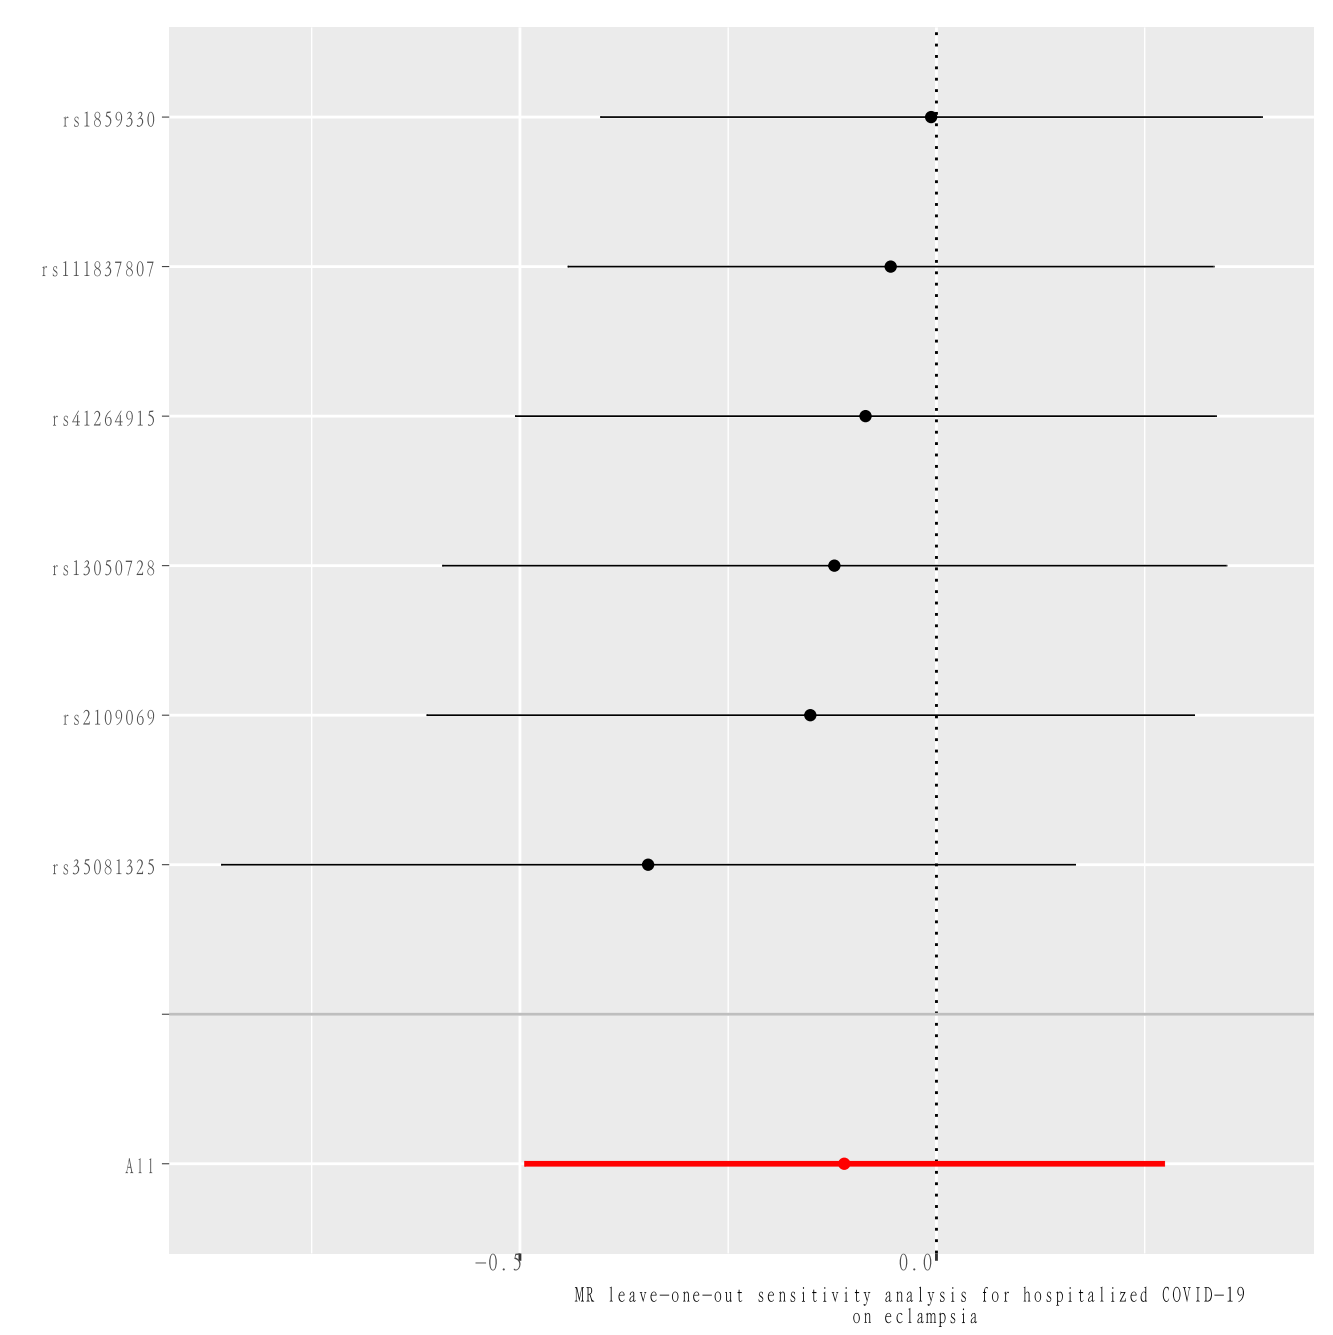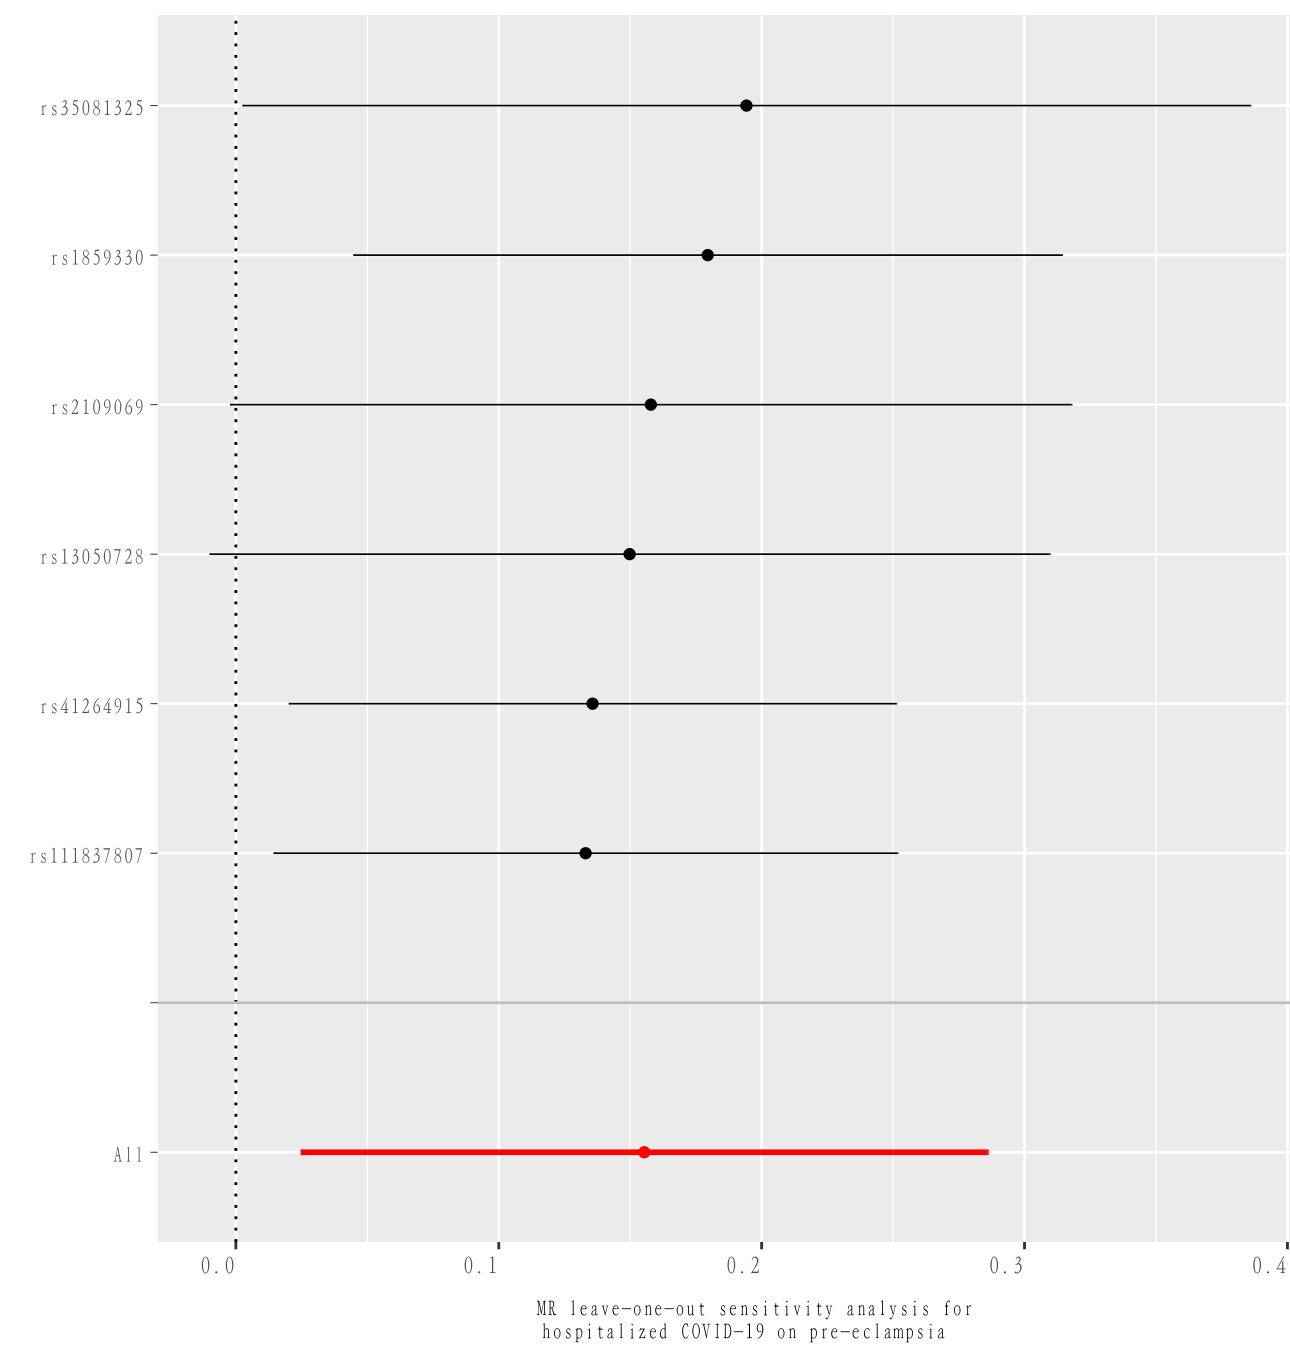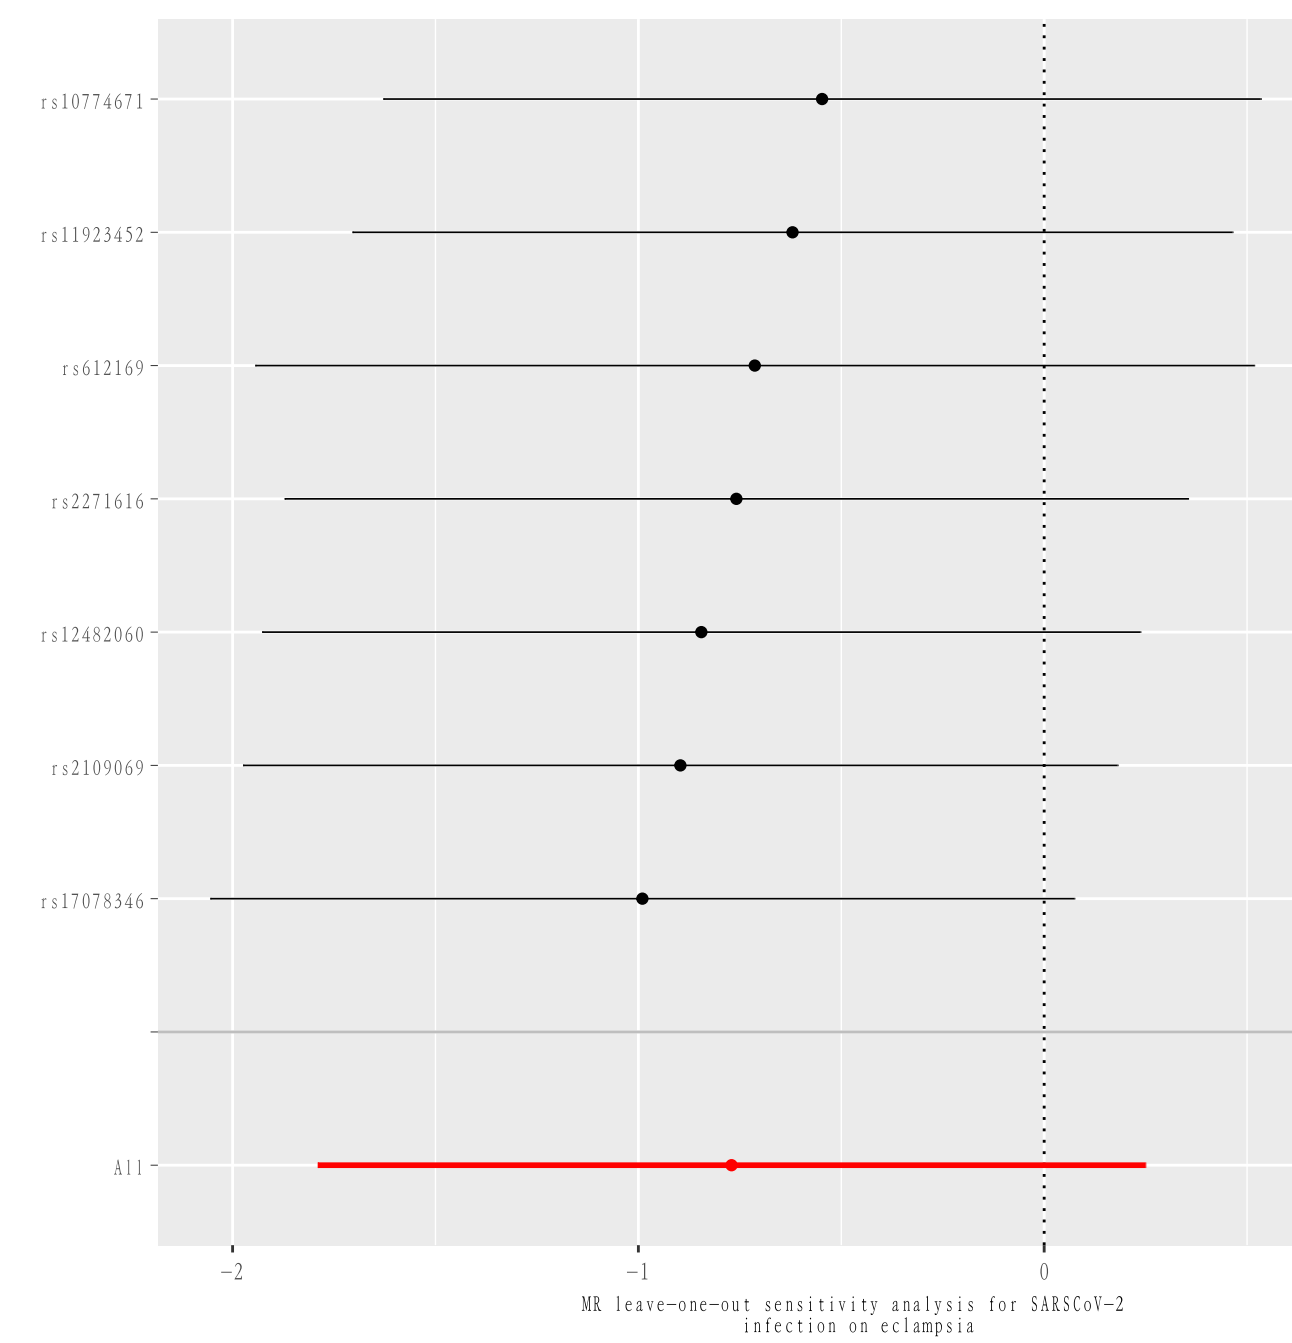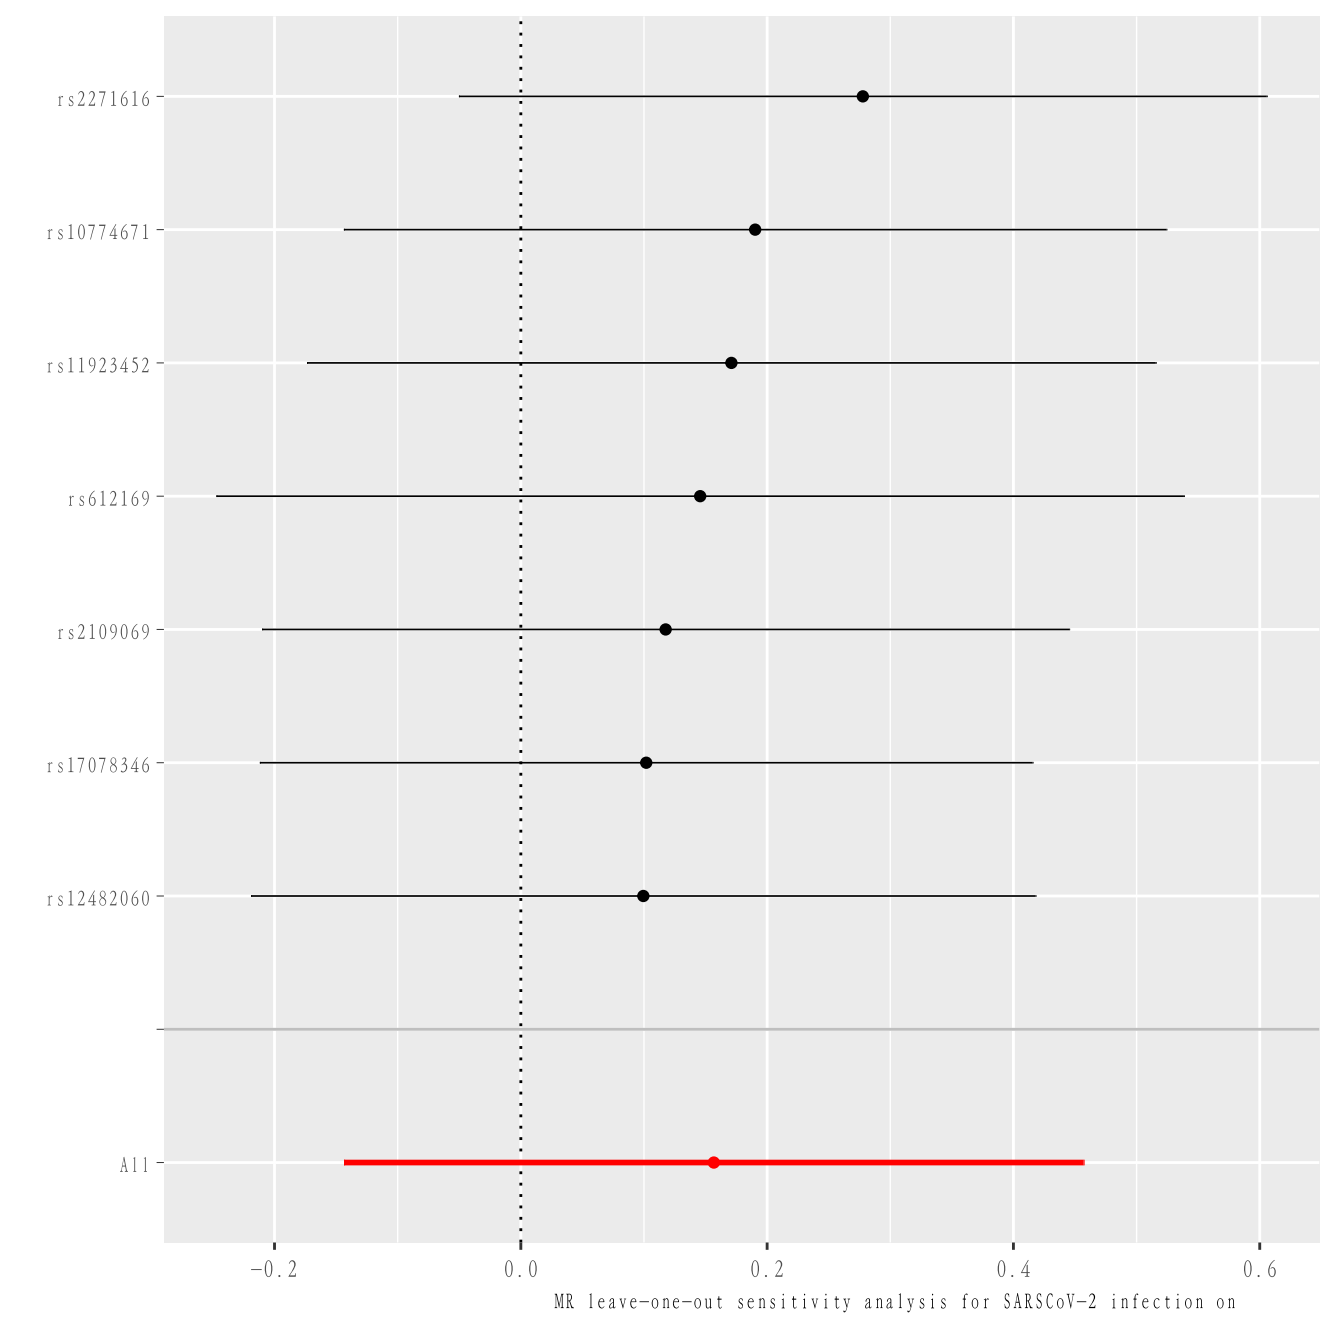

Supplement Figure 3 Leave-one-out analyses of causal effect of three COVID-19 severity phenotypes on pre-eclampsia or eclampsia.
